# Supplementary material for: Impact Assessment of an Innovative Integrated Care Model for Older Complex Patients with Multimorbidity: The CareWell Project
Source: PubMed Central journal article supplement (PMC7243835; doi:10.5334/ijic.4711), 2020-05-22
Supplement: ijic-20-2-4711-s1.pdf [file ijic-20-2-4711-s1.pdf]

**Table S1:** Description of the existing organizational model, and the specific elements of the integrated care model and its implementation by each pilot site.

|                                                                                                                                   | Pilot site             |                  |                        |                |                |               |
|-----------------------------------------------------------------------------------------------------------------------------------|------------------------|------------------|------------------------|----------------|----------------|---------------|
|                                                                                                                                   | Basque Country (Spain) | Zagreb (Croatia) | Lower Silesia (Poland) | Veneto (Italy) | Puglia (Italy) | Powys (Wales) |
| <b>Setting</b>                                                                                                                    |                        |                  |                        |                |                |               |
| Population (inhabitants)                                                                                                          | 2,200,000              | 1,100,000        | 3,000,000              | 4,900,000      | 4,100,000      | 133,000       |
| <b>Existing organization model</b>                                                                                                |                        |                  |                        |                |                |               |
| <b>Commonalities</b>                                                                                                              |                        |                  |                        |                |                |               |
| Stable patient:                                                                                                                   |                        |                  |                        |                |                |               |
| GP and GP nurse responsible for case management                                                                                   | ✓                      | ✓                | ✓                      | ✓              | ✓              | ✓             |
| Social workers in charge of social care interventions thought home visits                                                         | ✓                      | ✓                | ✓                      | ✓              | ✓              | ✓             |
| Unstable patient (out of hospital):                                                                                               |                        |                  |                        |                |                |               |
| GP (with/without GP nurse) defines therapeutic care plan, follows up the patient's status, and refers to specialist if necessary. | ✓                      | ✓                | ✓                      | ✓              | ✓              | ✓             |
| Can activate the emergency services                                                                                               | ✓                      | ✓                | ✓                      | ✓              | ✓              | ✓             |
| Within hospital care:                                                                                                             |                        |                  |                        |                |                |               |
| Specialists are in charge of diagnosis, drug prescription and therapeutic plan definition                                         | ✓                      | ✓                | ✓                      | ✓              | ✓              | ✓             |
| Hospital nurse coordinates tests, provides medication (prescribed by the specialist), implements therapeutic plans                | ✓                      | ✓                | ✓                      | ✓              | ✓              | ✓             |
| At hospital discharge:                                                                                                            |                        |                  |                        |                |                |               |
| GP and GP nurse responsible for patient follow-up and training to promote self-management.                                        | ✓                      | ✓                | ✓                      | ✓              | ✓              | ✓             |
| ICT tools                                                                                                                         |                        |                  |                        |                |                |               |
| Community alarm                                                                                                                   | –                      | –                | –                      | –              | –              | –             |
| <b>Differences</b>                                                                                                                |                        |                  |                        |                |                |               |
| Stable patient:                                                                                                                   |                        |                  |                        |                |                |               |
| Identification of frail patients by risk stratification tools                                                                     | ✓                      | ✓                | –                      | ✓              | ✓              | –             |
| Coordination between health and social care                                                                                       | ✓                      | –                | –                      | ✓              | –              | –             |
| Face-to-face multidisciplinary team meeting                                                                                       | ✓                      | ✓                | –                      | ✓              | –              | ✓             |
| Coordination of healthcare resources                                                                                              | ✓                      | –                | –                      | ✓              | –              | –             |
| Unstable patient (out of hospital):                                                                                               |                        |                  |                        |                |                |               |
| Can activate home care/home-hospitalization nurses                                                                                | ✓                      | –                | –                      | ✓              | –              | –             |
| Within hospital care:                                                                                                             |                        |                  |                        |                |                |               |
| Referent internist: case management and coordination with GP                                                                      | ✓                      | –                | –                      | ✓              | –              | –             |
| At hospital discharge:                                                                                                            |                        |                  |                        |                |                |               |
| Hospital liaison nurse: communication between primary and secondary care                                                          | ✓                      | –                | –                      | ✓              | –              | –             |
| GP and GP nurse can schedule home                                                                                                 | ✓                      | –                | –                      | ✓              | –              | –             |

|                                                                                                                             | Pilot site             |                  |                        |                |                |               |
|-----------------------------------------------------------------------------------------------------------------------------|------------------------|------------------|------------------------|----------------|----------------|---------------|
|                                                                                                                             | Basque Country (Spain) | Zagreb (Croatia) | Lower Silesia (Poland) | Veneto (Italy) | Puglia (Italy) | Powys (Wales) |
| visits for an intensive follow-up                                                                                           |                        |                  |                        |                |                |               |
| ICT tools                                                                                                                   |                        |                  |                        |                |                |               |
| Electronic prescription                                                                                                     | ✓                      | ✓                | –                      | ✓              | –              | –             |
| Messaging between professionals                                                                                             | ✓                      | ✓                | –                      | ✓              | –              | ✓             |
| Resource and process management platform                                                                                    | ✓                      | –                | ✓                      | ✓              | –              | –             |
| Health and wellbeing information portal                                                                                     | –                      | –                | –                      | –              | –              | ✓             |
| Telehealth, Telecare                                                                                                        | ✓                      | –                | –                      | ✓              | ✓              | –             |
| <b>New Integrated care model</b>                                                                                            |                        |                  |                        |                |                |               |
| <b>Integrated care coordination</b>                                                                                         |                        |                  |                        |                |                |               |
| Stable/Unstable patient:                                                                                                    |                        |                  |                        |                |                |               |
| Improved definition of care manager role                                                                                    | –                      | –                | –                      | –              | ✓              | –             |
| Improved information sharing among healthcare professionals via central storage of data and definition of shared care plans | ✓                      | –                | –                      | –              | ✓              | ✓             |
| Within hospital care:                                                                                                       |                        |                  |                        |                |                |               |
| Wider deployment of reference internist                                                                                     | ✓                      | –                | –                      | –              | –              | –             |
| At hospital discharge:                                                                                                      |                        |                  |                        |                |                |               |
| Wider deployment of hospital liaison nurse                                                                                  | ✓                      | –                | –                      | –              | –              | –             |
| Smooth transition support by facilitating information sharing, using ICT systems                                            | –                      | –                | ✓                      | –              | –              | ✓             |
| ICT tools:                                                                                                                  |                        |                  |                        |                |                |               |
| Improved communication between healthcare professionals                                                                     | ✓                      | ✓                | –                      | ✓              | ✓              | ✓             |
| Interconsultations via EHR                                                                                                  | –                      | –                | –                      | ✓              | –              | –             |
| Video consultations                                                                                                         | –                      | –                | –                      | ✓              | –              | ✓             |
| Virtual space within EHR                                                                                                    | –                      | –                | –                      | –              | ✓              | –             |
| ICT system integration                                                                                                      | –                      | ✓                | –                      | –              | –              | –             |
| <b>Patient empowerment and home support</b>                                                                                 |                        |                  |                        |                |                |               |
| ICT tools                                                                                                                   |                        |                  |                        |                |                |               |
| Promotion of patient and caregiver empowerment through access to the health-related educational material                    | ✓                      | ✓                | –                      | ✓              | –              | –             |
| Patients can access or enter clinical information and book appointments                                                     | ✓                      | –                | –                      | ✓              | –              | ✓             |
| Messaging between healthcare professionals and patients/caregivers                                                          | ✓                      | –                | –                      | –              | –              | –             |
| Monitoring of patient health status, mainly led by nurses                                                                   | ✓                      | ✓                | ✓                      | ✓              | ✓              | ✓             |
| Remote monitoring (telemonitoring)                                                                                          | –                      | ✓                | ✓                      | ✓              | ✓              | ✓             |
| Phone calls                                                                                                                 | ✓                      | –                | –                      | –              | –              | –             |
| Supervised questionnaires online                                                                                            | ✓                      | –                | –                      | –              | –              | –             |
| Teleconsultations                                                                                                           | –                      | –                | –                      | –              | ✓              | –             |

GP, general practitioner; EHR, electronic health record; ICT, information and communication technology.

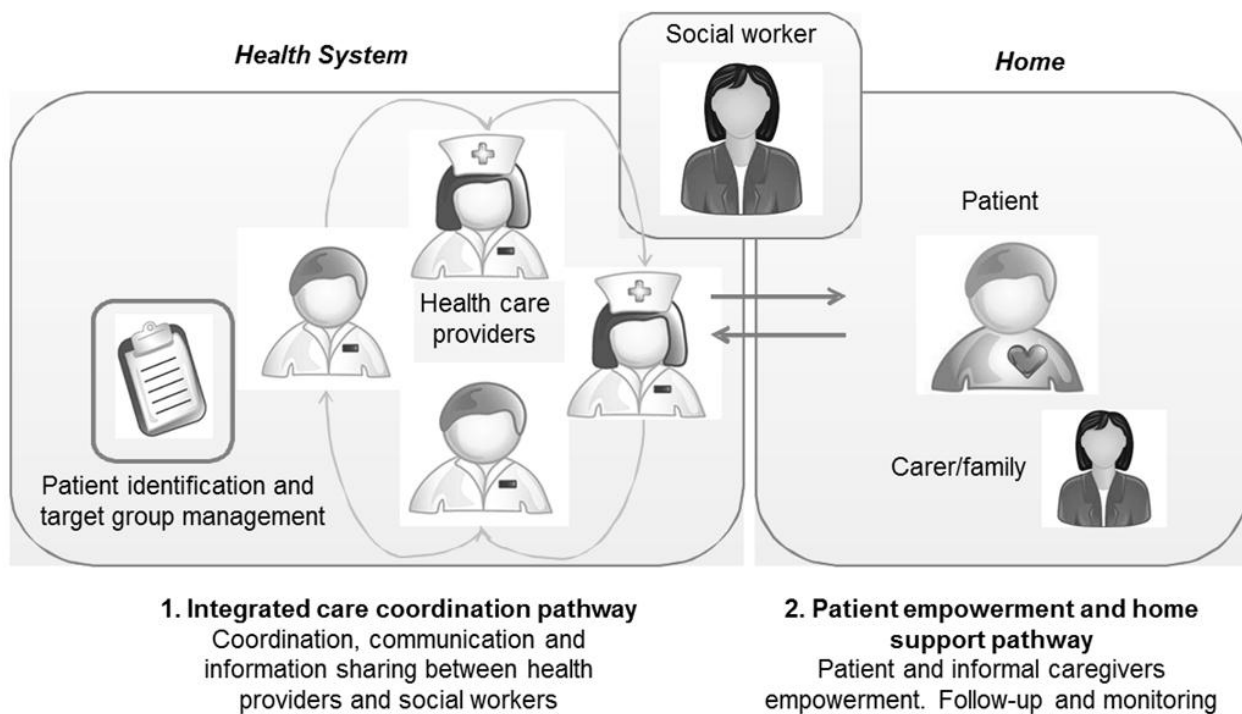

**Fig1 Additional** Description of the integrated care pathway. The program is based on two main elements, integrated care coordination and patient empowerment and home support pathways
